# Supplementary material for: In Vitro Bioactivities&nbsp;of Isoindolin-1-3-Phosophonate Compounds
Source: Research Square preprint supplement (doi:10.21203/rs.3.rs-284373/v1), 2021-03-13
Supplement: Supplementary file 1 [file 07d86e878f63ce873cdff104.docx]

**Diethyl 2-(2,2-dimethoxyethyl)-3-oxoisoindolin-1-ylphosphonate (4a)**

**RMN1H**

**RMN 31P**

**2)Diethyl 2-benzyl-3-oxoisoindolin-1-ylphosphonate (4b)**

**RMN1H**

**RMN 31P**

**diethyl (2-cyclohexyl-3-oxoisoindolin-1-yl)phosphonate(4c)**

**RMN1H**

**RMN13C**

**diethyl (2-(4-methoxybenzyl)-3-oxoisoindolin-1-yl)phosphonate(4d)**

**RMN1H**

**RMN13C**

**RMN31P**

**diethyl (2-butyl-3-oxoisoindolin-1-yl)phosphonate (4e)**

**RMN1H**

**RMN31P**

**hydrolyse**

**2-benzyl-3-oxoisoindolin-1-yl)phosphonic acid**

**RMN1H**

**RMN13C**

**RMN31P**

**(2-cyclohexyl-3-oxoisoindolin-1-yl)phosphonic acid**
